# Supplementary material for: Meta-Analysis of Cytotoxicity Studies Using Machine Learning Models on Physical Properties of Plant Extract-Derived Silver Nanoparticles
Source: MDPI journal article supplement (doi:10.3390/ijms24044220), 2023-02-20
Supplement: s1 [file s1]

## Supplementary Document 1

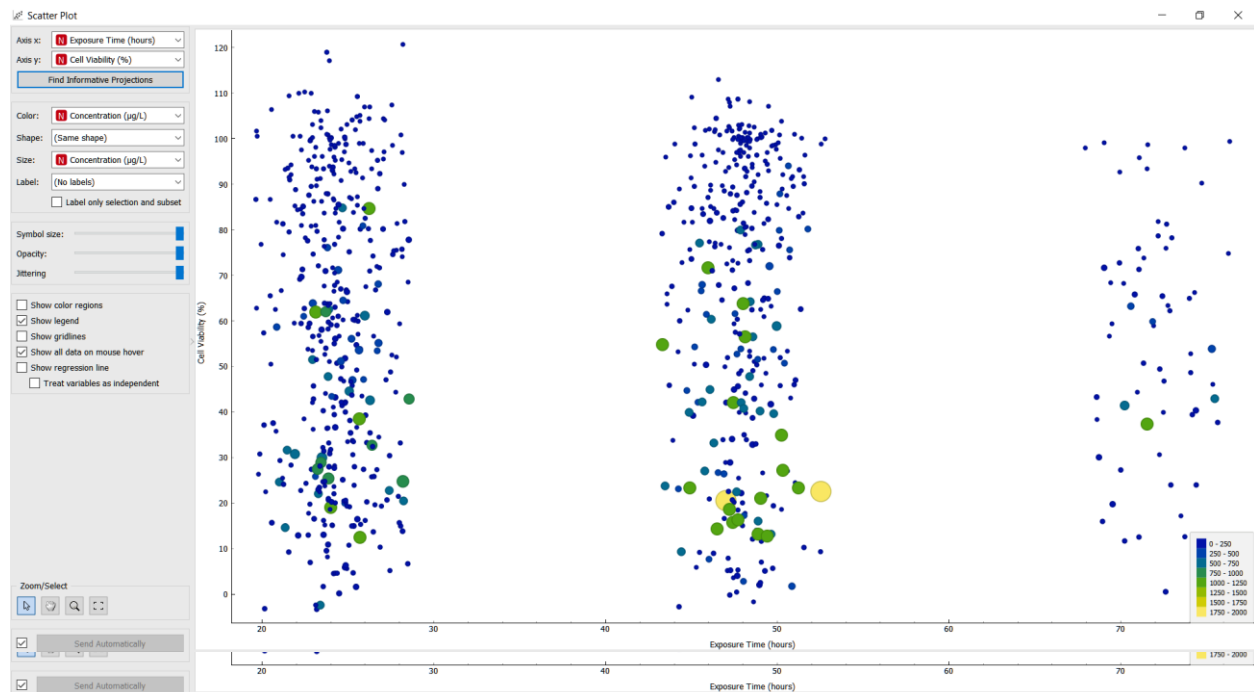

Figure S1. Graph representing cell viability vs exposure time respective to concentrations of nanoparticles for the carcinoma cell lines.

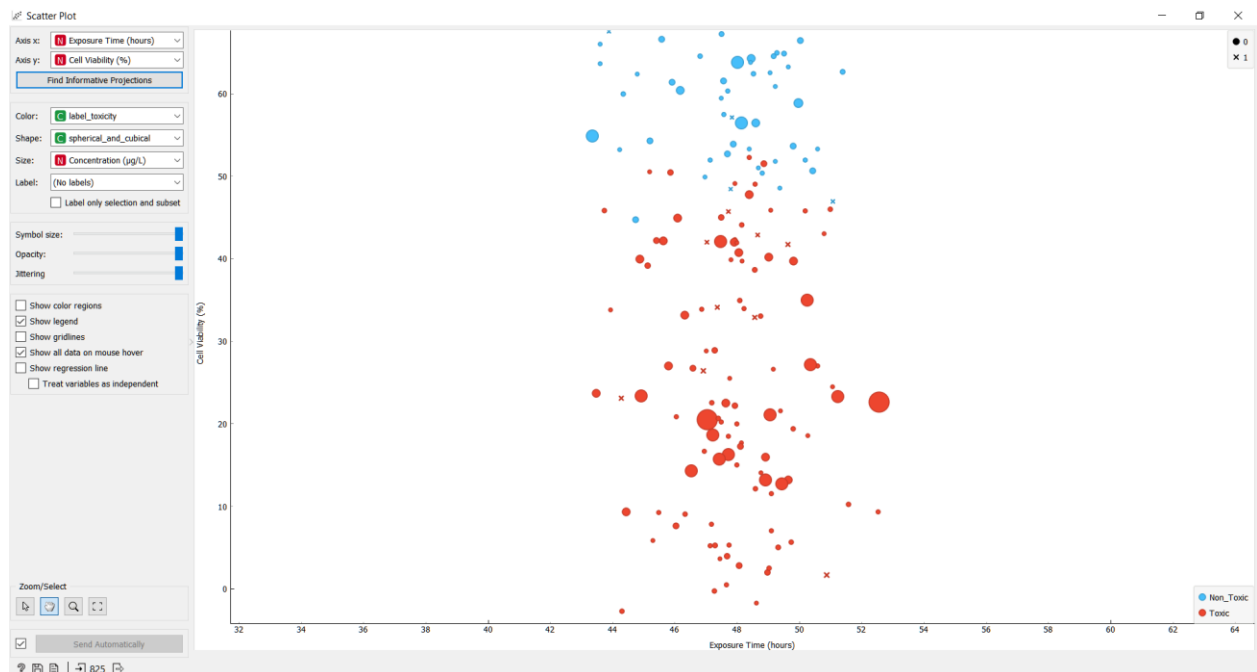

Figure S2. Graph representing cell viability vs exposure time respective to the morphology of nanoparticles for the carcinoma cell lines.

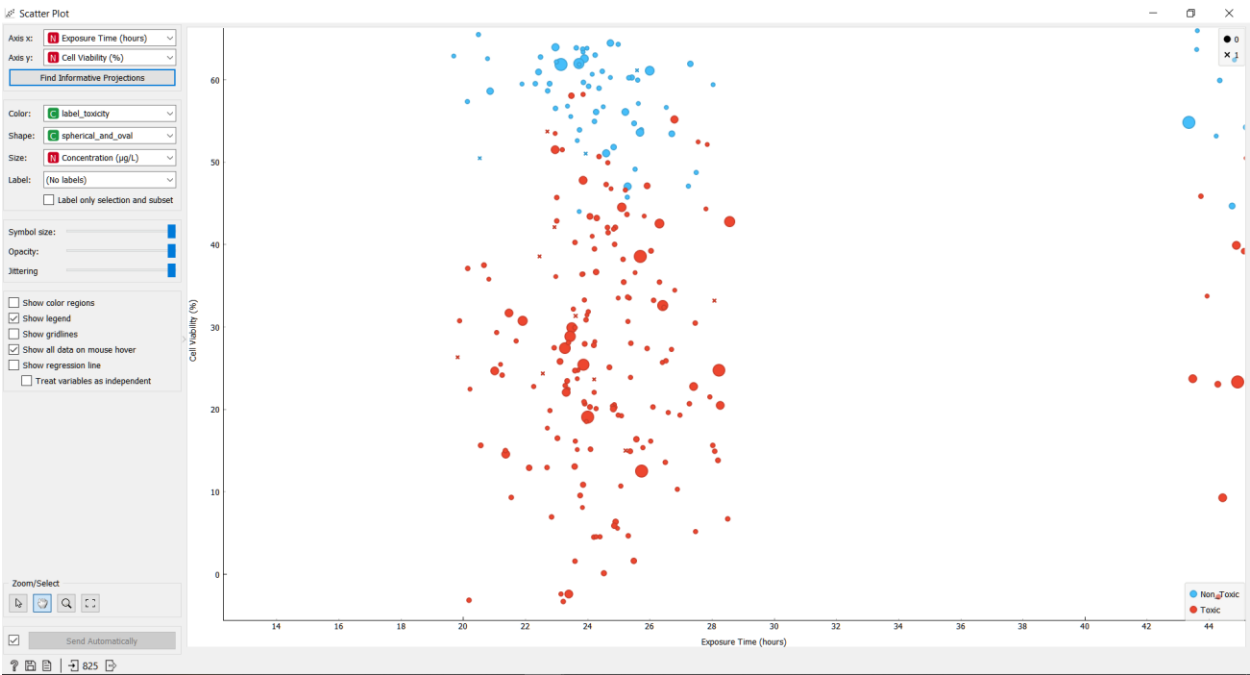

Figure S3. Graph representing cell viability vs exposure time respective to the morphology of nanoparticles for the carcinoma cell lines.

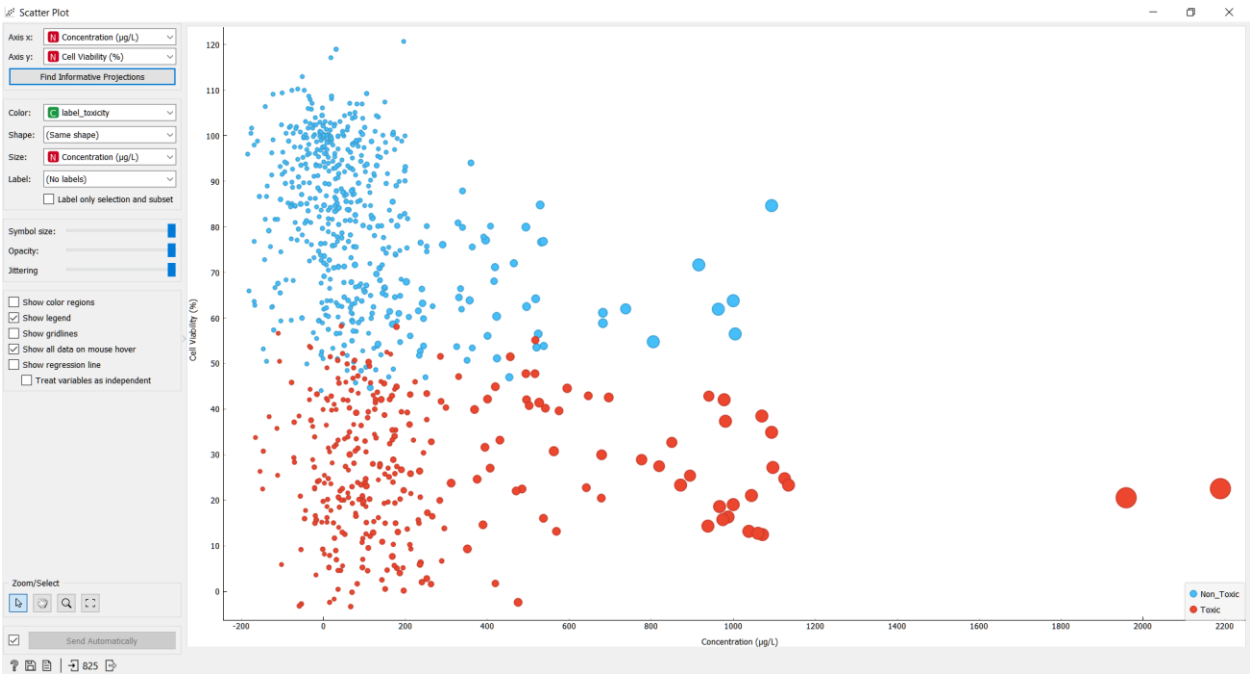

Figure S4. Graph representing cell viability vs concentrations of nanoparticles for the carcinoma cell lines.

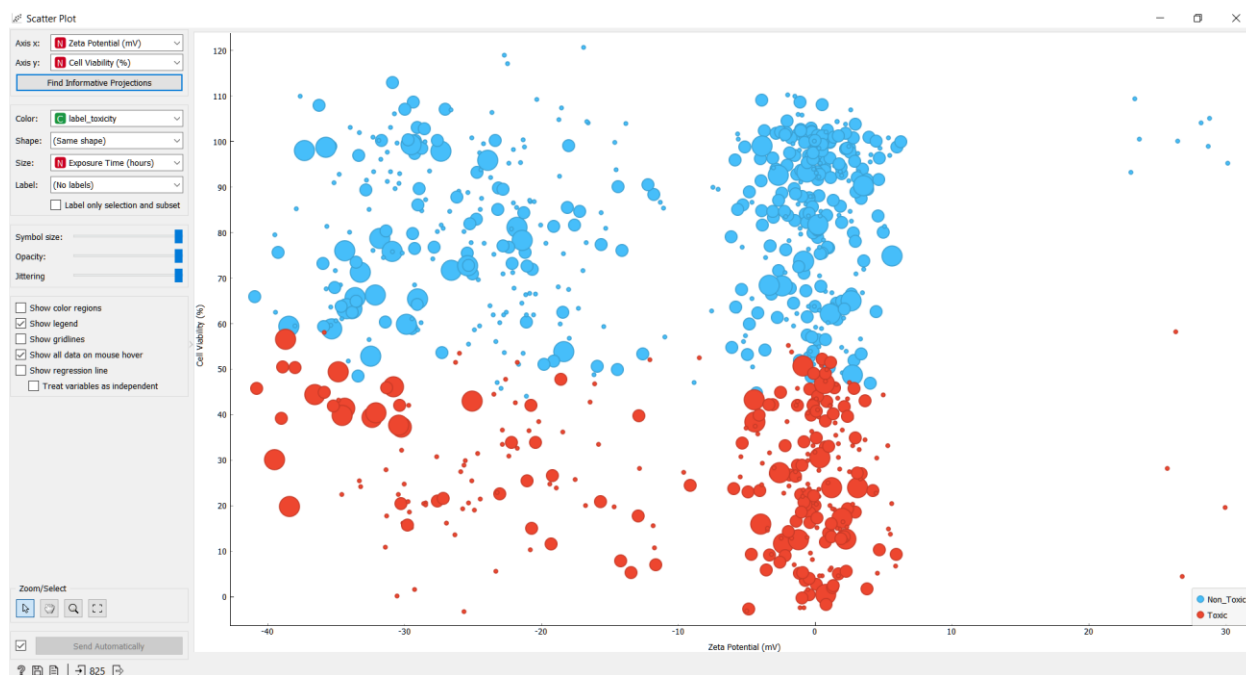

Figure S5. Graph representing cell viability vs zeta potential respective to exposure time of nanoparticles for the carcinoma cell lines.

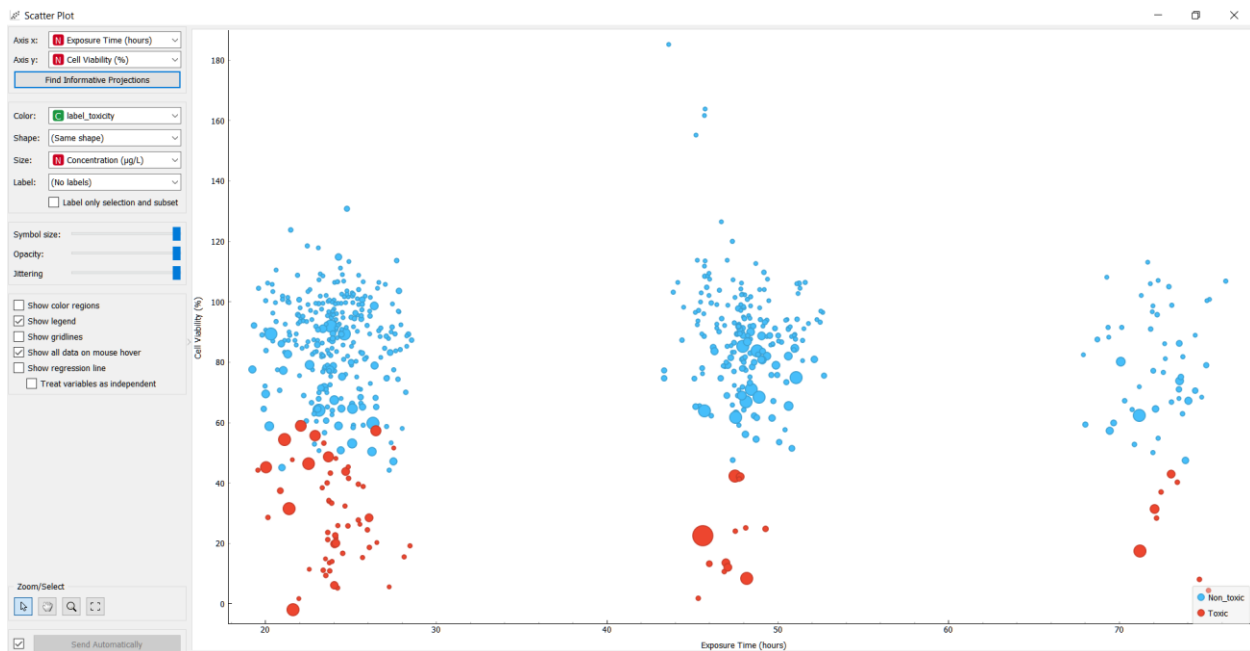

Figure S6. Graph representing cell viability vs exposure time respective to concentrations of nanoparticles for the normal cell lines.

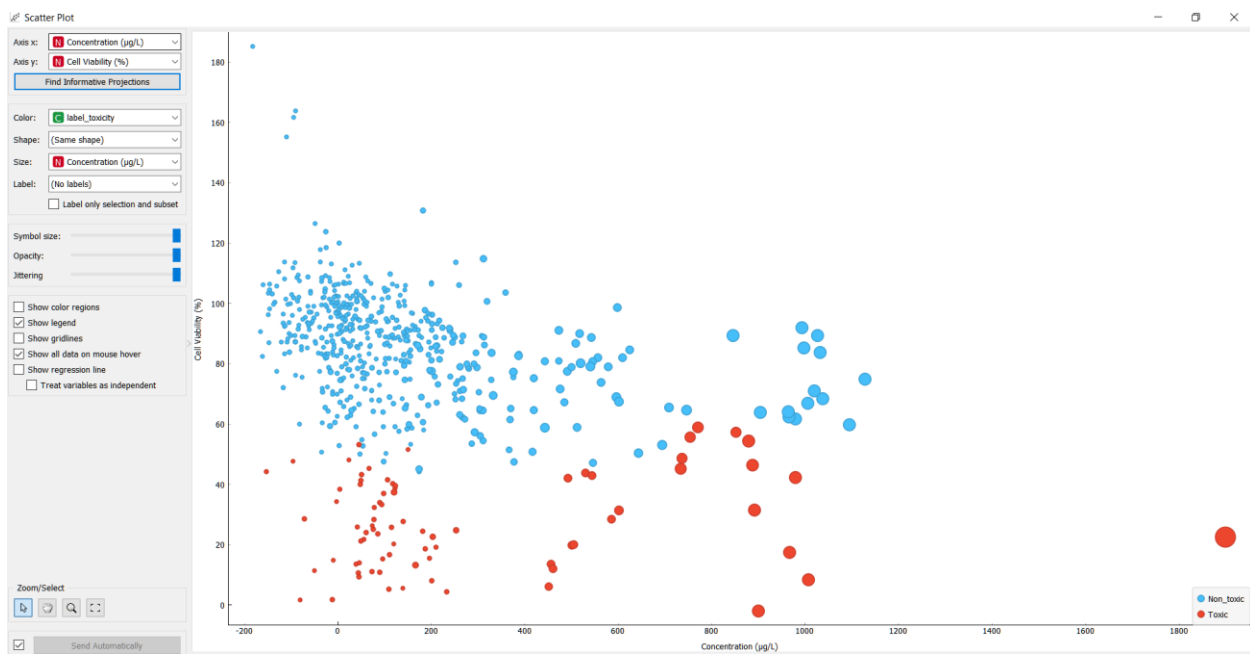

Figure S7. Graph representing cell viability vs concentrations of nanoparticles for the normal cell lines.

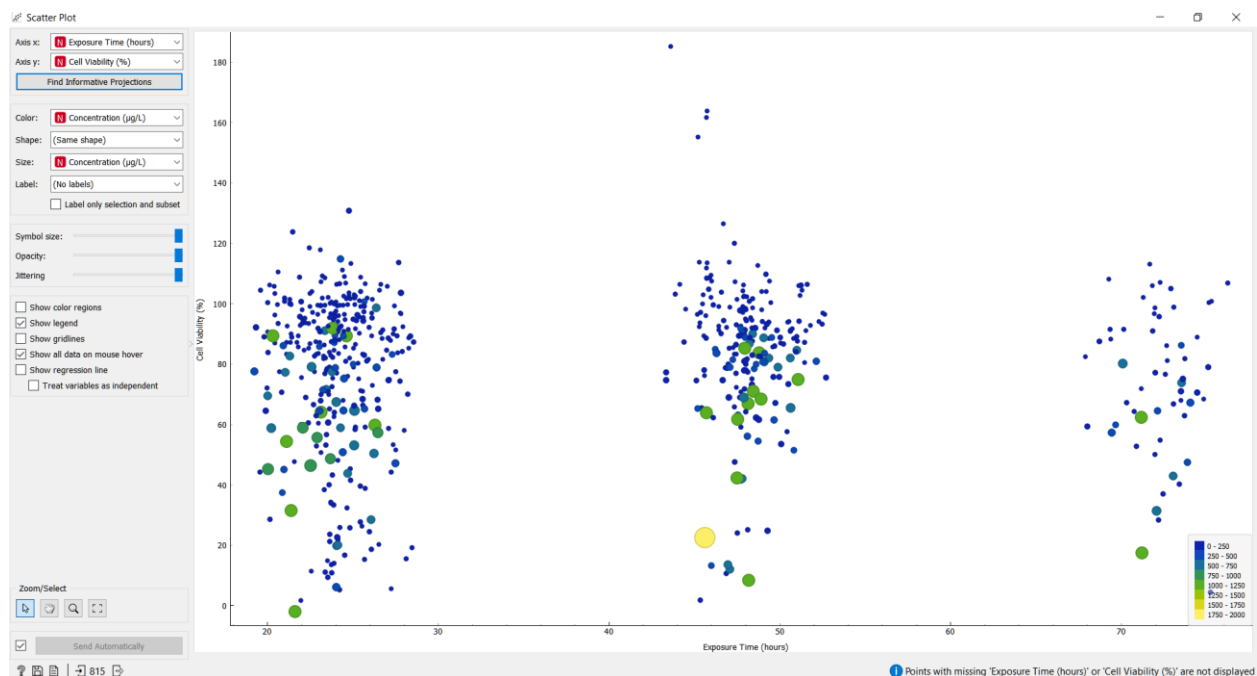

Figure S8. Graph representing cell viability vs exposure time respective to concentrations of nanoparticles for the normal cell lines.

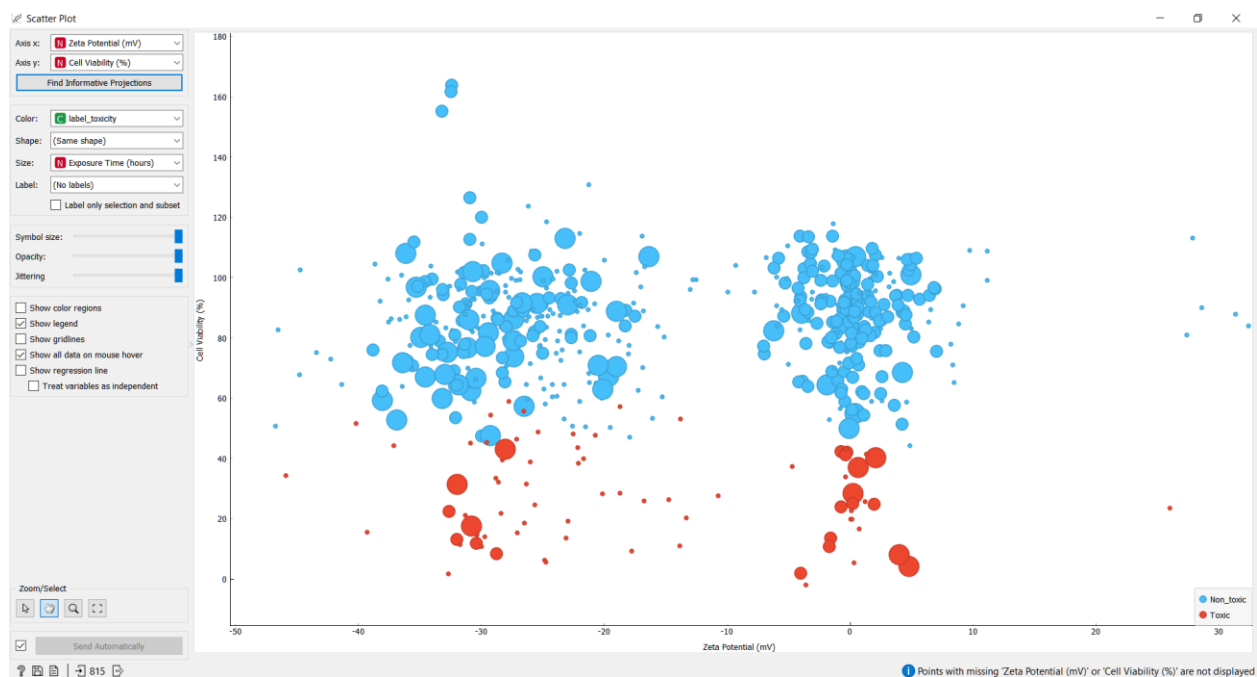

Figure S9. Graph representing cell viability vs zeta potential respective to exposure time of nanoparticles for the normal cell lines.

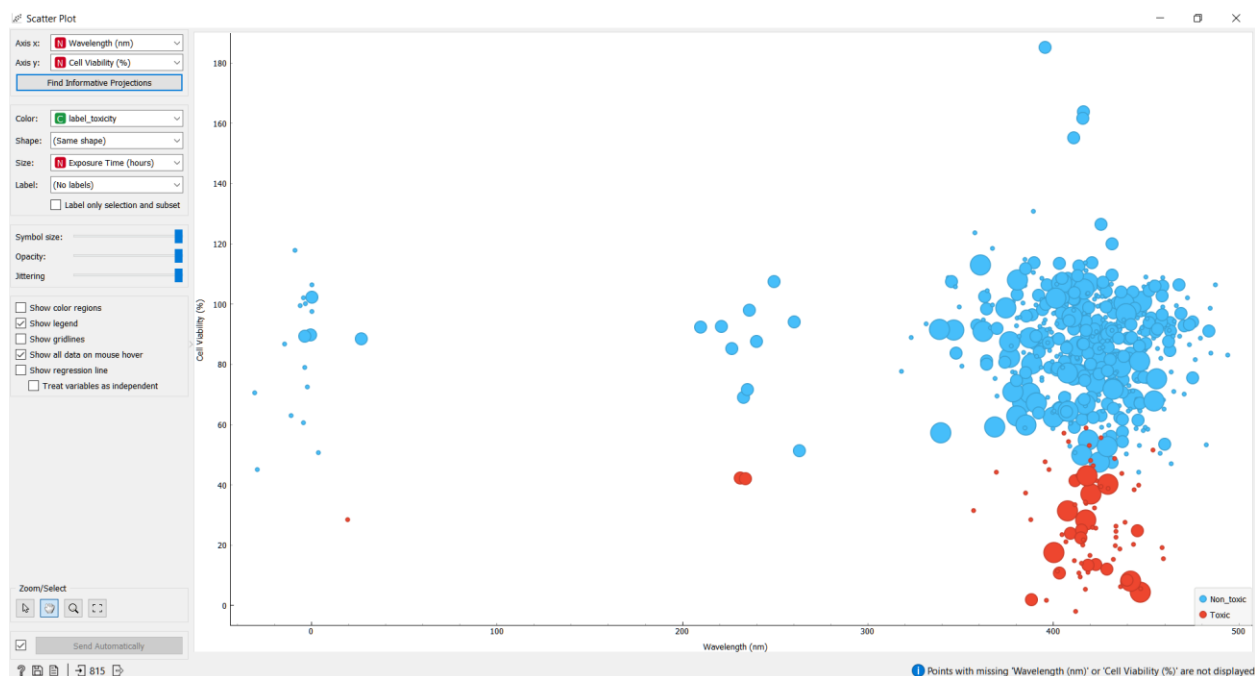

Figure S10. Graph representing cell viability vs wavelength respective to exposure time of nanoparticles for the normal cell lines.

**Table S1.** Research articles that were utilized for developing a dataset for building the machine learning models.

| Research articles that were utilized for developing a dataset for building the machine learning models |                                                                   |                  |              |                        |                                                                                                                                   |
|--------------------------------------------------------------------------------------------------------|-------------------------------------------------------------------|------------------|--------------|------------------------|-----------------------------------------------------------------------------------------------------------------------------------|
| Sr.No.                                                                                                 | Author Name and Journal                                           | Publication Year | Dataset      | Entity Used            | Results                                                                                                                           |
| 1                                                                                                      | Vishnu Priya, et al., <i>Saudi Journal of Biological Sciences</i> | 2021             | Experimental | Animal L929 fibroblast | Confirms that the silver nanoparticles synthesized with <i>Scutellaria barbata</i> aqueous extract area potent wound-healing drug |
| 2                                                                                                      | Pallavi S.S., et al., <i>Saudi Journal of Biological Sciences</i> | 2021             | Experimental | Human A549             | Evident that <i>Streptomyces hirsutus</i> strain SNPGA-8 AgNPs are potentially promising to be applied for biomedical uses.       |
| 3                                                                                                      | Anushree Pandey, et al., <i>Materials Today: Proceedings</i>      | 2021             | Experimental | Human MDA-MB-231       | Encapsulated nanoparticle drug conjugate                                                                                          |

|   |                                                                     |      |              |                                               |                                                                                                                                                                                                      |
|---|---------------------------------------------------------------------|------|--------------|-----------------------------------------------|------------------------------------------------------------------------------------------------------------------------------------------------------------------------------------------------------|
|   |                                                                     |      |              |                                               | demonstrated a significant response against breast cancer cell lines                                                                                                                                 |
| 4 | Mani M., et al., <i>Environmental Research</i>                      | 2021 | Experimental | Human MCF-7                                   | MTT assay showed the anti-cancer activity of silver nanoparticles in a dose-dependent manner and is undoubtedly a potential agent for breast cancer                                                  |
| 5 | Gudikandula Krishna, et al., <i>Heliyon</i>                         | 2021 | Experimental | Human A549 and MCF-7                          | Prepared nanoparticle materials were found to be effectively potent against lung and breast cancer cell lines.                                                                                       |
| 6 | Yonghong Kong, et al., <i>Arabian Journal of Chemistry</i>          | 2021 | Experimental | Human HUVEC, WiDr, SW1417, DLD-1, and LS-123  | In cellular models, silver nanoparticles revealed significant anti-colorectal carcinoma activities against colorectal carcinoma cell lines. In vivo and clinical trials confirmed the same in humans |
| 7 | Yunjian Wang, et al., <i>Arabian Journal of Chemistry</i>           | 2021 | Experimental | Human HUVEC, PANC-1, ASPC-1, DLD-1 and PaCa-2 | Silver nanoparticles had very low cell viability and anti-human pancreatic cancer properties dose-dependently on the chosen cell lines                                                               |
| 8 | Azmat Ali Khan, et al., <i>Saudi Journal of Biological Sciences</i> | 2021 | Experimental | Human THP-1 and MDA-MB-231                    | AgNPs embodies intriguing anti-cancer potential against metastatic breast cancer cells.                                                                                                              |
| 9 | Leeba Balan, et al., <i>Journal of Molecular Structure</i>          | 2021 | Experimental | Human MCF-7                                   | Synthesized nanoparticles showed a remarkable antimicrobial property at against the human pathogenic organisms used                                                                                  |

|    |                                                                              |      |              |                              |                                                                                                                                                                                                    |
|----|------------------------------------------------------------------------------|------|--------------|------------------------------|----------------------------------------------------------------------------------------------------------------------------------------------------------------------------------------------------|
| 10 | Swarnendra Banerjee, et al., <i>South African Journal of Botany</i>          | 2021 | Experimental | Human HEK-293                | AgNPs may have the potency to combat cancer by manipulating apoptosis.                                                                                                                             |
| 11 | Pratik Das, et al., <i>Environmental Research</i>                            | 2022 | Experimental | Human                        | Phytochemicals attached to nanoparticle surface might be playing a crucial role to suppress the lethal effect of bare silver nanoparticles and also play a major role in their anti-cancer effect. |
| 12 | Gomathi A.C., et al., <i>Journal of Drug Delivery Science and Technology</i> | 2019 | Experimental | Human MCF-7                  | Silver Nanoparticles from Tamarindus indica fruit shell extract may act as a potential therapeutic agent for human breast cancer treatment                                                         |
| 13 | Mohammad Oveset, et al., <i>Saudi Journal of Biological Sciences</i>         | 2021 | Experimental | Human MDA-MB-231             | Nanomaterials were biocompatible and demonstrated the potential anti-cancer activities against MDA MB-231 cells after 24-hour exposure                                                             |
| 14 | Ali Naghizadehet, et al., <i>Environmental Technology &amp; Innovation</i>   | 2021 | Experimental | Human AGS and HFF            | Biogenic AgNPs-JCE have an efficiency to degrade rhodamine b and eriochrome black T dyes under UV and visible light irradiations                                                                   |
| 15 | Naser Abbasi, et al., <i>Arabian Journal of Chemistry</i>                    | 2021 | Experimental | Human HUVEC and MCF-7        | The synthesized silver nanoparticles had excellent cell viability on the HUVECs line and indicated this method was non-toxic                                                                       |
| 16 | Ozlem Kaplan, et al., <i>Journal of Drug Delivery Science and Technology</i> | 2021 | Experimental | Human MCF-7, HT-29 and HUH-7 | Obtained results demonstrated that synthesized AgNPs had an average size diameter of <100 nm                                                                                                       |



|    |                                                                                            |      |              |                                               |                                                                                                                                                                                    |
|----|--------------------------------------------------------------------------------------------|------|--------------|-----------------------------------------------|------------------------------------------------------------------------------------------------------------------------------------------------------------------------------------|
|    |                                                                                            |      |              |                                               | and have strong anti-cancer, antibacterial, antifungal and wound healing potentials.                                                                                               |
| 17 | Anam Rana Gul, et al., <i>Chemical Engineering Journal</i>                                 | 2020 | Experimental | Animal SCC-7, RAW-264.7 and Human HEK-293     | The biological functionality and biocompatibility of a common agriculture waste based AgNPs, suggest their promising role as a potential drug carrier in the field of therapeutics |
| 18 | Krishanu Ghosal, et al., <i>International Journal of Biological Macromolecules</i>         | 2020 | Experimental | Animal OP-9 and Human HeLa, MCF-7             | Anti-cancer activity of AgNPs is strongly related with the generation of intracellular ROS leading to apoptosis                                                                    |
| 19 | M. Govindappa, et al., <i>Journal of Drug Delivery Science and Technology</i>              | 2020 | Experimental | Animal L929 fibroblast, Human HeLa, MCF-7     | Pomegranate fruit fleshy pericarp acts as natural agent to synthesize AgNPs, which may gain attention to treat P. aeruginosa infection                                             |
| 20 | Sneha S. Rao, et al., <i>International Journal of Biological Macromolecules</i>            | 2020 | Experimental | Animal NIH-3T3                                | Oxidative stress and intracellular protein leakage were observed due to AgNP interaction with the cell bringing about bactericidal effect.                                         |
| 21 | Himabindu Padinjarathil, et al., <i>International Journal of Biological Macromolecules</i> | 2018 | Experimental | Human-HepG-2, A549 and HCT-116, Animal 3T3-L1 | Nanoparticles displayed selective Cytotoxicity towards human adenocarcinoma, colorectal carcinoma, and hepatocellular carcinoma cells                                              |
| 22 | Dongxiao Wang, et al., <i>Arabian Journal of Chemistry</i>                                 | 2022 | Experimental | Human HUVEC, HT-29, HCT-116, HCT-8 and Ramos- | Anti-human colorectal carcinoma properties of Pectin/Ag NPs are related to their                                                                                                   |

|    |                                                                                                       |      |              |                             |                                                                                                                                              |
|----|-------------------------------------------------------------------------------------------------------|------|--------------|-----------------------------|----------------------------------------------------------------------------------------------------------------------------------------------|
|    |                                                                                                       |      |              | 2G6.4C10                    | antioxidant effects.                                                                                                                         |
| 23 | Mostafa M. El-Sheekh, et al.,<br><i>Environmental Nanotechnology,<br/>Monitoring &amp; Management</i> | 2021 | Experimental | Human WISH, HeLa and CaCO-2 | Low concentrations of silver oxide nanoparticles showed the safety limit effect against HeLa and CaCo-2, and no hazard on WISH cells         |
| 24 | Shahnaz Majeed, et al., <i>Sustainable Chemistry and Pharmacy</i>                                     | 2019 | Experimental | Human MCF-7, MG-63 and 3T3  | Nanoparticles showed anti-cancer activity against MCF-7 and MG-63 cell lines and less toxicity towards normal human fibroblast 3T3 cells     |
| 25 | Arul Kumar Murugesan, et al.,<br><i>Environmental Nanotechnology,<br/>Monitoring &amp; Management</i> | 2021 | Experimental | Human A549                  | AgNPs had potent anti-cancer activity against human lung cancer cell line (A549) by decreasing cell proliferation and inducing apoptosis     |
| 26 | Nur Asna Binti Azhar, et al.,<br><i>Toxicology in Vitro</i>                                           | 2020 | Experimental | Human HePG-2                | AgNPs have produced cytotoxic effects on HepG2 cells and have potential to be used as an anti-cancer treatment, for hepatocellular carcinoma |
| 27 | Jayashree Shanmugam, et al.,<br><i>Nanomaterials</i>                                                  | 2022 | Experimental | Human MCF-7                 | Reduction in the feasibility of cancer cells was established via MTT assay, which suggests potential biomedical applications                 |
| 28 | Arpitha Badarinath Mahajanakatti, et al., <i>Molecules</i>                                            | 2022 | Experimental | Human MCF-7                 | Based on the MTT assay result, it is summarized that the nanoconjugates possessed potential anti-cancer activity                             |
| 29 | Muthuraj Rudrappa, et al.,<br><i>Nanomaterials</i>                                                    | 2022 | Experimental | Human U118MG                | Developed an eco-friendly AgNPs synthesis using P. alba                                                                                      |

|    |                                                           |      |              |                        |                                                                                                                                          |
|----|-----------------------------------------------------------|------|--------------|------------------------|------------------------------------------------------------------------------------------------------------------------------------------|
|    |                                                           |      |              |                        | leaf extract with potential cytotoxic and antibacterial capacity                                                                         |
| 30 | Abdulaziz A. Al-Khedhairy and Rizwan Wahab, <i>Metals</i> | 2022 | Experimental | Human HePG-2 and MCF-7 | AgNPs induced Cytotoxicity and apoptosis via caspase pathways in cancer cells                                                            |
| 31 | Femi Olawale, et al., <i>Nanomaterials</i>                | 2021 | Experimental | Human HEK-293          | The NPs synthesized demonstrated significant free radical scavenging activity and a dose-dependent cytotoxic and genotoxic effect.       |
| 32 | Surbhi Shinde, et al., <i>Applied Sciences</i>            | 2021 | Experimental | Animal ATCC CCL-81     | Silver and its bioconjugates from Prunus cerasus leaf extracts are noncytotoxic to produce antimicrobial compounds with low Cytotoxicity |
| 33 | Kaushik Kumar Bharadwaj, et al., <i>Nanomaterials</i>     | 2021 | Experimental | Human U87-MG           | AgNPs exhibited significant dose-dependent anti-cancer activity on U87-MG (human primary glioblastoma) cells                             |
| 34 | Mohd Shahnawaz Khan, et al., <i>Pharmaceutics</i>         | 2021 | Experimental | Human MCF-7, HCT-116   | Observed cell migration inhibiting potential of AgNPs in a concentration-dependent manner in MCF-7 cell lines                            |
| 35 | Magdalena Wypij, et al., <i>Molecules</i>                 | 2020 | Experimental | Human MCF-7, RAW-264.7 | AgNPs displayed a high cytotoxic effect against cancer cells, their functionalization lead to their use in targeted cancer therapy       |
| 36 | Hanan M. Al-Yousef, et al., <i>Processes</i>              | 2020 | Experimental | Human HePG-2 and MCF-7 | Ag NPs demonstrated considerable anti-cancer activity against the studied cell lines                                                     |

|    |                                                                                  |      |              |                                |                                                                                                                                                                                                     |
|----|----------------------------------------------------------------------------------|------|--------------|--------------------------------|-----------------------------------------------------------------------------------------------------------------------------------------------------------------------------------------------------|
| 37 | Montserrat Lopez-Carrizale, et al.,<br><i>Antibiotics</i>                        | 2018 | Experimental | Human fibroblast               | Infections due to multidrug resistant microorganisms could be treated by the use of a synergistic combination of antimicrobial drugs and AgNPs                                                      |
| 38 | Fozia Shaheen, et al., <i>Nanomaterials</i>                                      | 2017 | Experimental | Human MCF-7                    | Ag exhibited significant cytotoxic differences after the laser exposure and revealed apoptotic activity against a breast cancer cell line                                                           |
| 39 | Adewale O. Fadaka, et al.,<br><i>International Journal of Molecular Sciences</i> | 2022 | Experimental | Human KMST-6, HT-29 and CaCO-2 | Selective and reduced Cytotoxicity demonstrated by GAC-AgNPs toward colon cancer cells with the surface, the composition can be used to control the biodistribution, uptake, and efficacy of AgNPs. |
| 40 | Desai A.S., et al.,<br><i>Journal of Functional Biomaterials</i>                 | 2022 | Experimental | Human HEK 293                  | Ag-NPs derived from the turmeric extract were biocompatible with HEK 293 cell lines                                                                                                                 |
